# Supplementary material
Source: publisher figshare collection journal article supplement (https://future-science-group.figshare.com/ndownloader/files/31362343)
Supplement: Supplementary file 1 [file 31362343]

**Supplementary table 2.** Factors affecting OS by Cox's proportional hazards regression analysis.

| Items | *P* value | HR | 95%CI | |
| --- | --- | --- | --- | --- |
| Lower | Upper |
| **Multivariate Cox's regression analysis** |  |  |  |  |
| Higher ITGA7 quantile | 0.015 | 1.557 | 1.090 | 2.223 |
| Age (≥35 years vs. <35 years) | 0.004 | 3.618 | 1.511 | 8.663 |
| WBC**#** (increased vs. non-increased) | <0.001 | 6.127 | 2.750 | 13.651 |

**#** Increased WBC was defined as B-ALL patients >30×109/L at diagnosis, and T-ALL patients >100×109/L at diagnosis. OS, overall survival; HR, hazard ratio; CI, confidence interval; ITGA7, integrin alpha7; WBC, white blood cell.
